# Supplementary material for: Negative Elongation Factor Controls Energy Homeostasis in Cardiomyocytes
Source: PubMed Central journal article supplement — Cell Rep. Author manuscript; Available in PMC 2014 Dec 26. (PMC4277258; doi:10.1016/j.celrep.2014.02.028), 2014-03-20

Figure S1. Loss of NELF-B results in cardiomyopathy  
Related to Figure 1

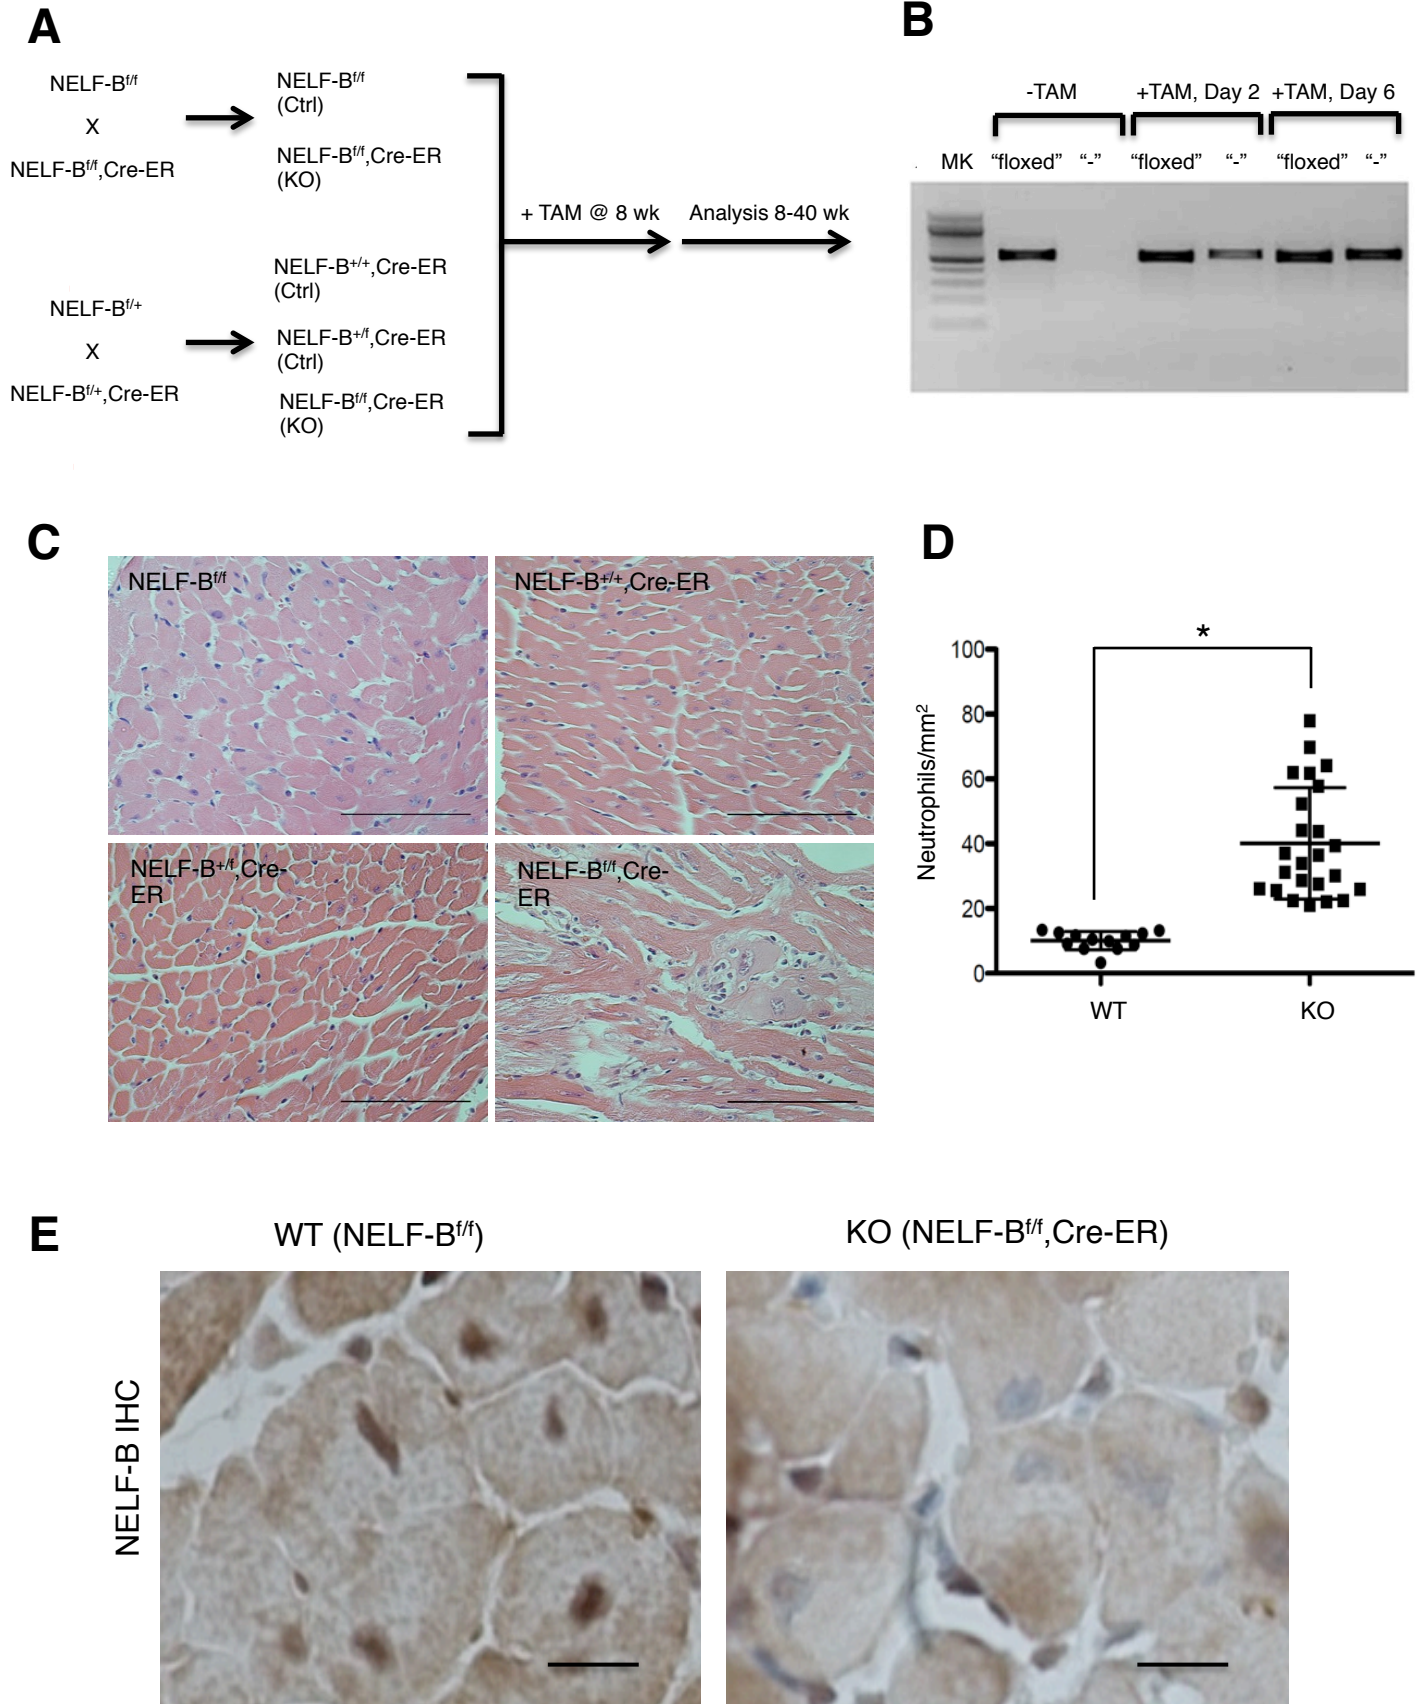

Figure S2. Cardiomyocyte-specific NELF-B deletion  
Related to Figure 1

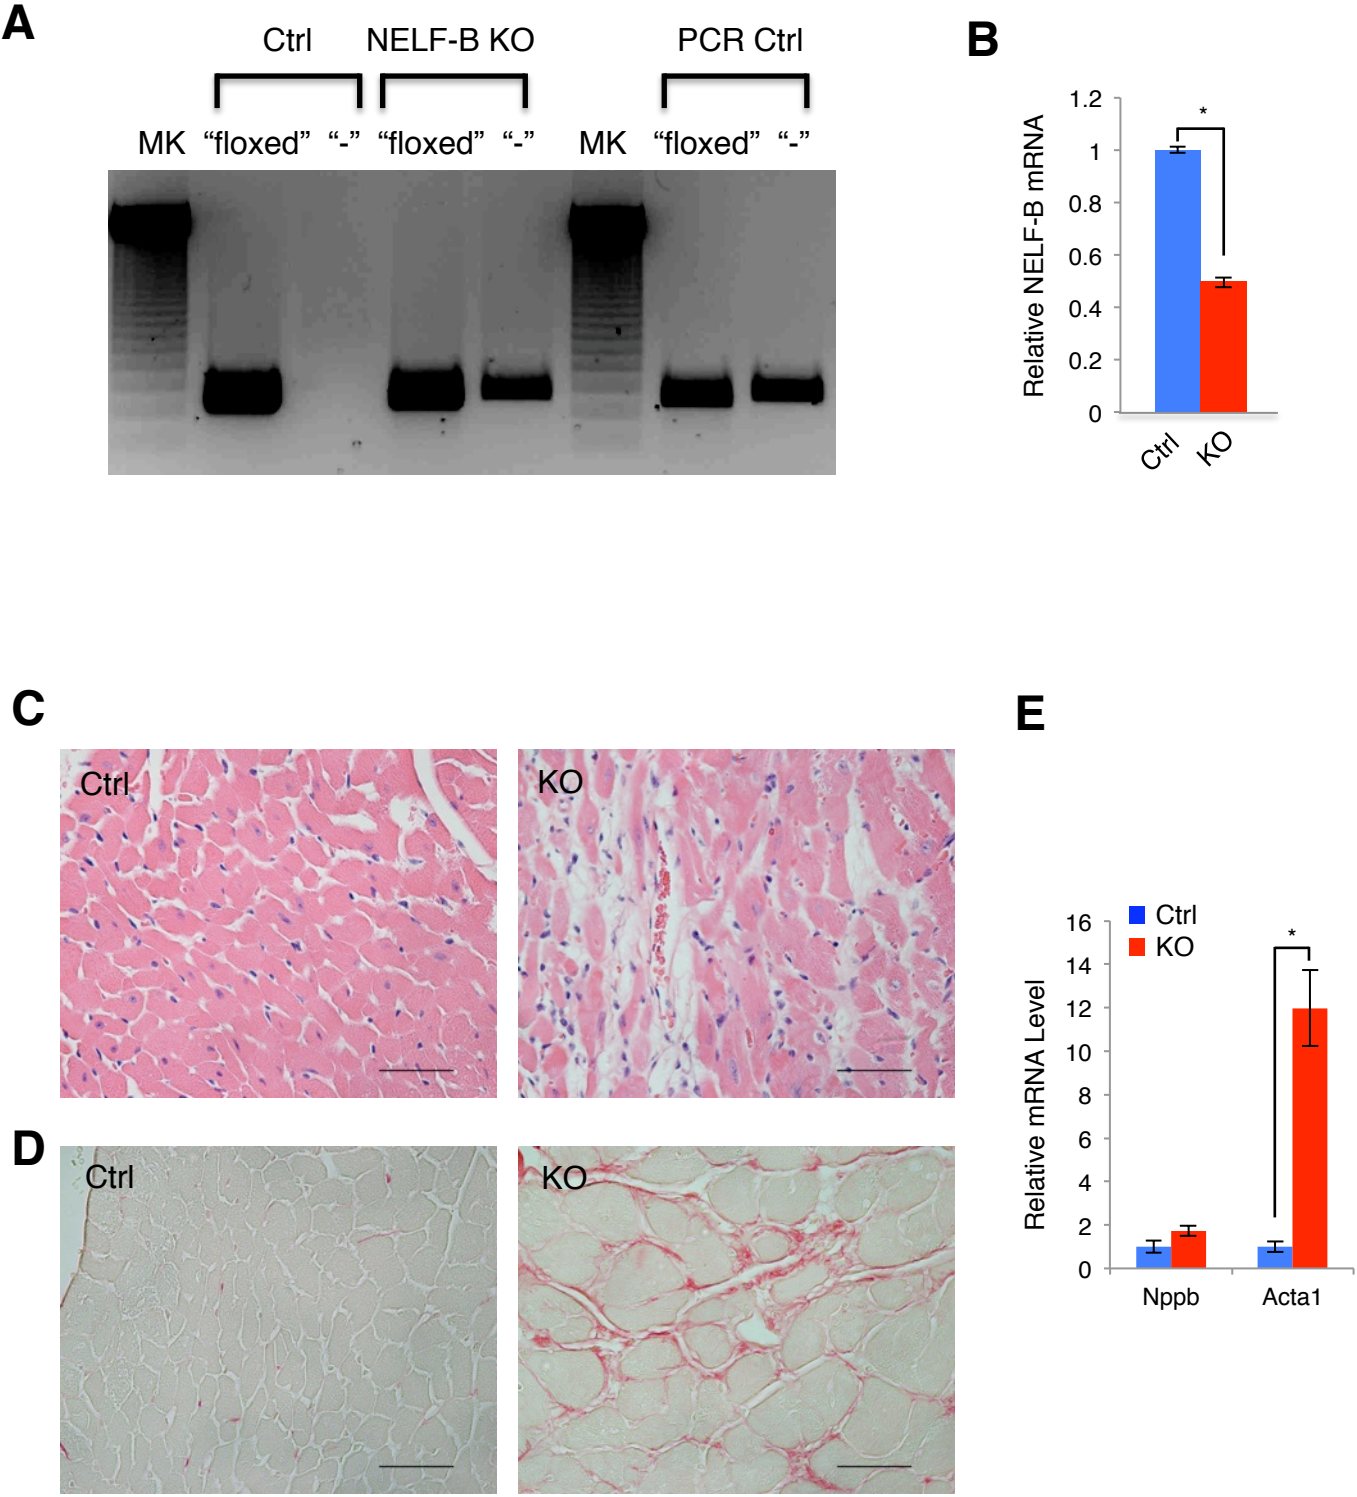

Figure S3. Gene expression analysis of NELF-B KO myocardium  
Related to Figures 2 and 3

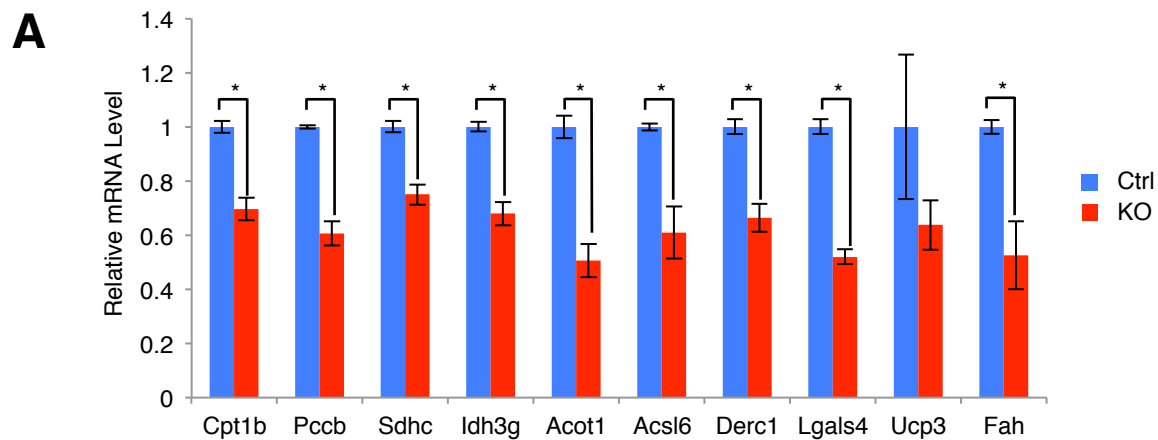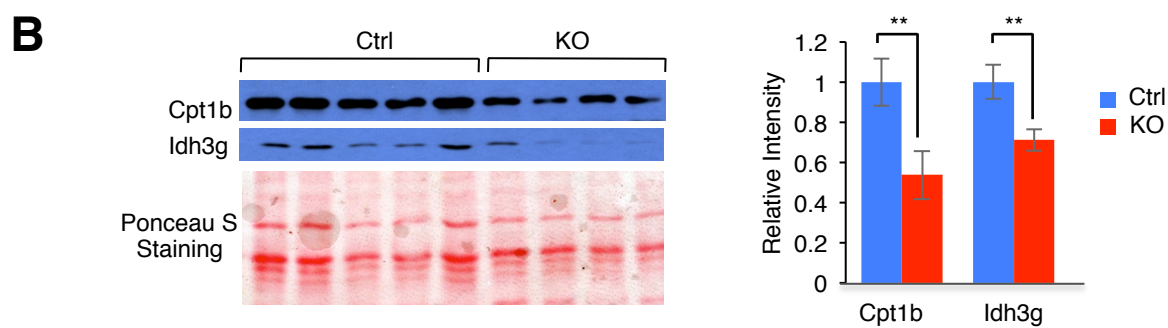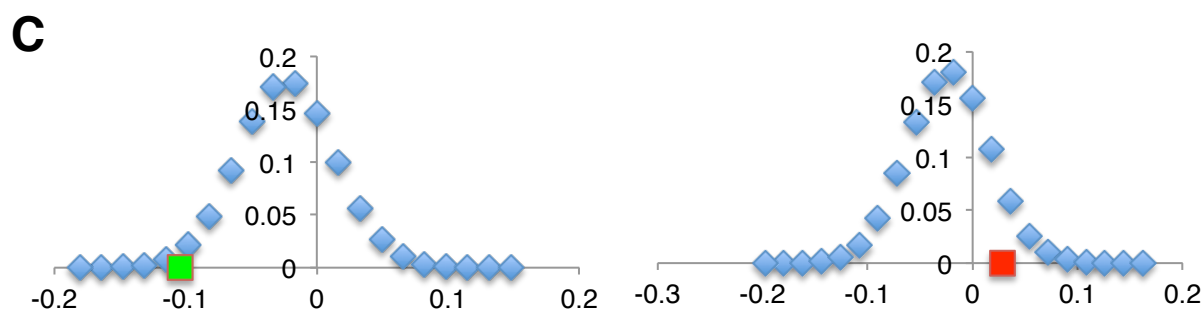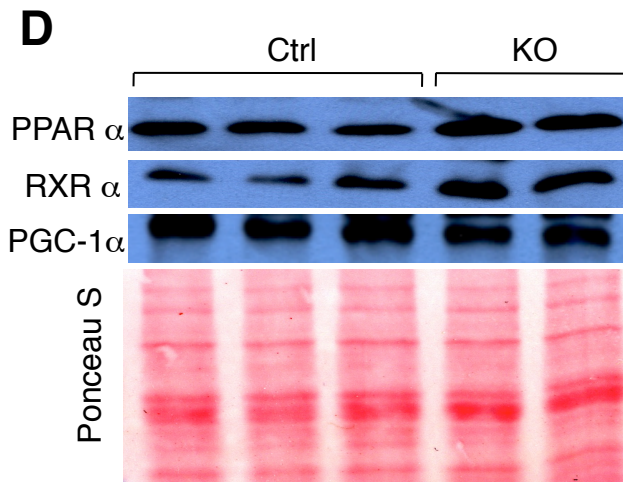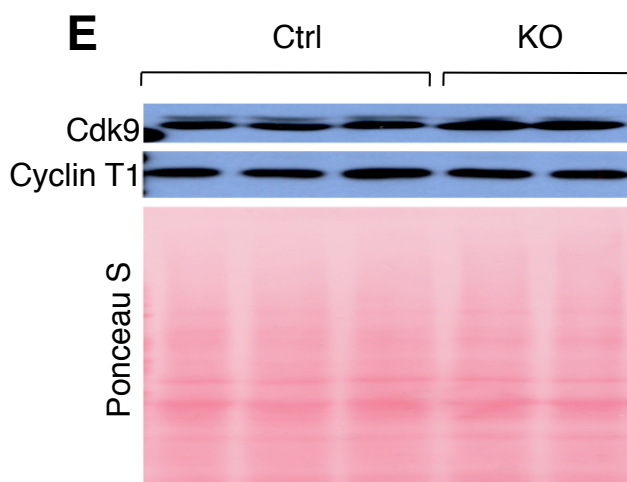

Figure S4. NELF influences chromatin binding of transcription initiation factors.  
Related to Figure 4

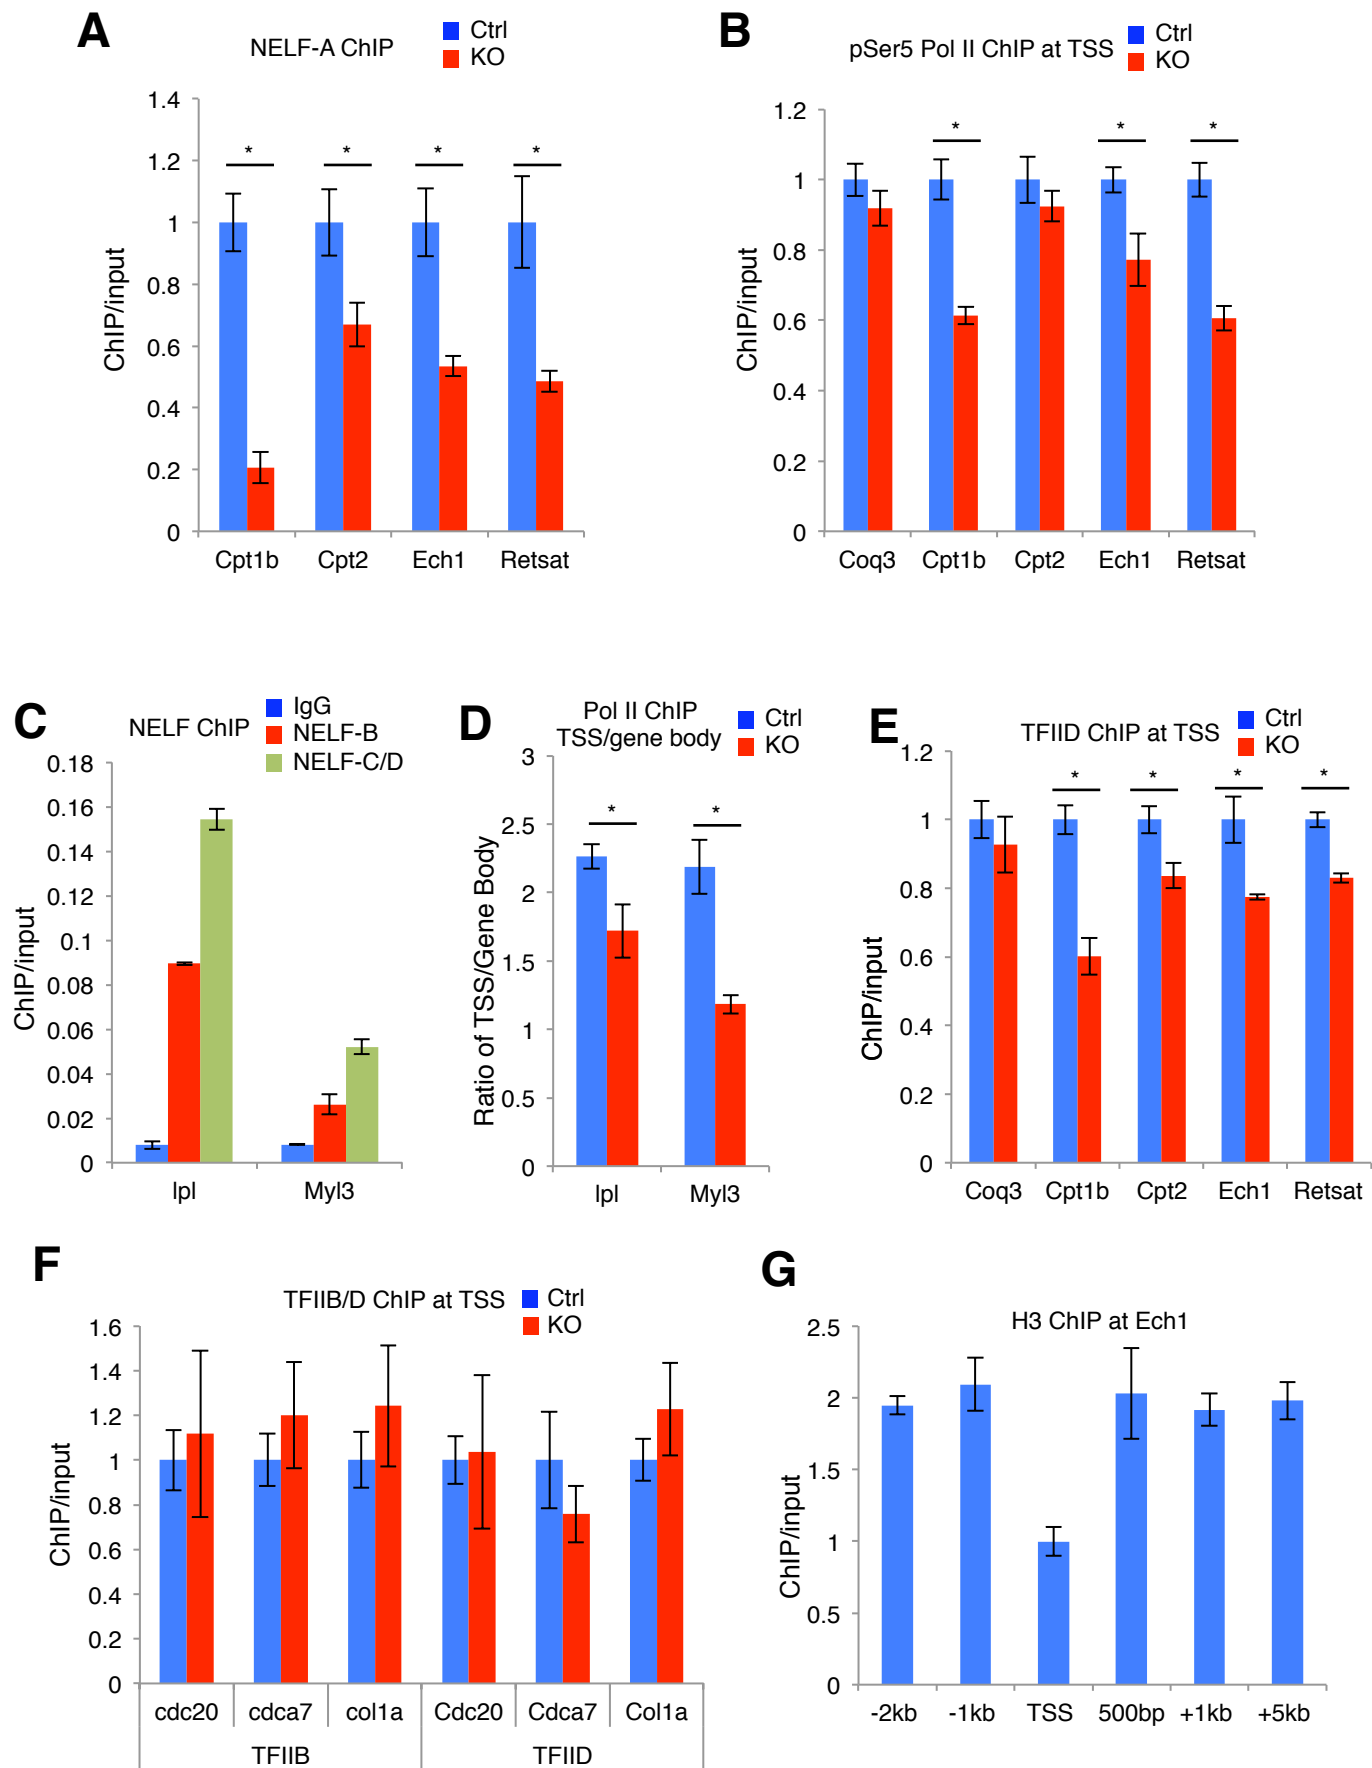

Supplement: NIHMS649550-supplement-supplemental_figures.pdf [file NIHMS649550-supplement-supplemental_figures.pdf]
