# Supplementary material for: Negative Elongation Factor Controls Energy Homeostasis in Cardiomyocytes
Source: PubMed Central journal article supplement — Cell Rep. Author manuscript; Available in PMC 2014 Dec 26. (PMC4277258; doi:10.1016/j.celrep.2014.02.028), 2014-03-20
Supplement: NIHMS649550-supplement-supplemental_table_1.pdf [file NIHMS649550-supplement-supplemental_table_1.pdf]

Supplementary Table S1. Echocardiography data for WT and KO mice at weeks 8, 16, 24, and 32 under baseline and dobutamine-stressed conditions.

|             |            | WT         |            |            |            | KO         |            |            |            |
|-------------|------------|------------|------------|------------|------------|------------|------------|------------|------------|
|             |            | W8         | W16        | W24        | W32        | W8         | W16        | W24        | W32        |
| HR<br>(bpm) | Baseline   | 457±14     | 425±7      | 422±9      | 408±13     | 427±10     | 442±9      | 424±8      | 369±17     |
|             | Dobutamine | 579±10*    | 528±5*     | 539±10*    | 516±13*    | 573±3*     | 519±10*    | 488±9*     | 416±35*    |
| EDD<br>(mm) | Baseline   | 3.71±0.07  | 3.47±0.09  | 3.69±0.13  | 3.84±0.07  | 3.60±0.08  | 3.62±0.09  | 3.71±0.1   | 3.59±0.08# |
|             | Dobutamine | 3.15±0.07* | 3.05±0.09* | 3.06±0.08* | 3.07±0.12* | 2.93±0.09* | 3.06±0.07* | 3.07±0.08* | 2.97±0.13* |
| ESD<br>(mm) | Baseline   | 2.43±0.08  | 2.16±0.13  | 2.54±0.18  | 2.81±0.09  | 2.39±0.12  | 2.41±0.1   | 2.60±0.15  | 2.68±0.15  |
|             | Dobutamine | 1.48±0.06* | 1.51±0.13* | 1.48±0.16* | 1.48±0.12* | 1.30±0.07* | 1.50±0.05* | 1.59±0.17* | 1.85±0.21* |
| FS<br>(%)   | Baseline   | 34±1       | 38±2       | 32±3       | 27±2       | 34±2       | 34±2       | 30±2       | 26±3       |
|             | Dobutamine | 53±2*      | 51±3*      | 52±4*      | 52±3*      | 57±1*      | 51±1*      | 49±4*      | 39±5*#     |

HR, heart rate; EDD, end diastolic dimension; ESD, end systolic dimension; FS, fractional shortening. WT: n=11; KO; n=8. \*  $p < 0.05$  vs corresponding baseline values; #  $p < 0.05$  vs 32 weeks old WT after dobutamine treatment.
