# Supplementary material for: Negative Elongation Factor Controls Energy Homeostasis in Cardiomyocytes
Source: PubMed Central journal article supplement — Cell Rep. Author manuscript; Available in PMC 2014 Dec 26. (PMC4277258; doi:10.1016/j.celrep.2014.02.028), 2014-03-20
Supplement: NIHMS649550-supplement-supplemental_table_2.pdf [file NIHMS649550-supplement-supplemental_table_2.pdf]

| symbol     | fold_change |
|------------|-------------|
| Atic       | -1.37       |
| Tnfaip8    | -1.37       |
| Ube4b      | -1.32       |
| EG625054   | -1.36       |
| Tesc       | -1.66       |
| Mrpl54     | -1.33       |
| Maob       | -1.36       |
| Slc40a1    | -1.82       |
| Lrp4       | -1.32       |
| Rps13      | -1.32       |
| Rps12      | -1.34       |
| Trip6      | -1.345      |
| Nope       | -1.45       |
| Hrc        | -1.47       |
| Fah        | -1.71       |
| Rangrf     | -1.53       |
| Tmod4      | -1.66       |
| Abhd11     | -1.53       |
| Cpt1b      | -1.59       |
| Fntb       | -1.4        |
| Rpl39      | -1.57       |
| Tceb3      | -1.45       |
| Rpl34      | -1.31       |
| D0H4S114   | -1.46       |
| Commd10    | -1.39       |
| Ech1       | -1.52       |
| Rgs6       | -1.32       |
| Emg1       | -1.31       |
| LOC1000395 | -1.46       |
| LOC1000441 | -1.32       |
| Bcas2      | -1.38       |
| Bcas3      | -1.33       |
| Coq3       | -1.37       |
| Il1rl1l    | -1.39       |
| Lamb2      | -1.42       |
| Gstt1      | -1.4        |
| Acads      | -1.38       |
| Cirbp      | -1.36       |
| Art1       | -1.55       |
| Sgcb       | -1.675      |
| Sgca       | -1.45       |

|             |        |
|-------------|--------|
| Fkbp10      | -1.32  |
| Sepw1       | -1.35  |
| Pcbp2       | -1.31  |
| Mdh2        | -1.45  |
| Myadm       | -1.37  |
| Ephx2       | -1.69  |
| Setx        | -1.31  |
| Maged2      | -1.35  |
| LOC641240   | -1.31  |
| Rabac1      | -1.405 |
| Cpt2        | -1.34  |
| Aarsd1      | -1.32  |
| Ccdc12      | -1.44  |
| LOC1000395  | -1.33  |
| Ptpre       | -1.865 |
| Acta2       | -1.535 |
| Pdk4        | -3.13  |
| LOC1000479  | -1.81  |
| Ssbp1       | -1.43  |
| Abhd1       | -1.35  |
| Spr         | -1.31  |
| Mid1ip1     | -1.47  |
| Acot1       | -2.35  |
| LOC1000481  | -1.41  |
| 1110001J03F | -1.87  |
| Socs2       | -1.34  |
| Dhrs7       | -1.325 |
| Dhrs4       | -1.56  |
| Pkig        | -1.425 |
| Slc35b1     | -1.51  |
| Angptl4     | -1.71  |
| Impdh2      | -1.43  |
| Rpl12       | -1.36  |
| Art5        | -1.88  |
| Mlxipl      | -1.39  |
| Ndufb10     | -1.69  |
| Rpl19       | -1.31  |
| Lgals4      | -2.535 |
| Ppp1r1a     | -1.39  |
| Hsd17b10    | -1.35  |
| Pdha1       | -1.31  |
| Mrps28      | -1.73  |

|             |        |
|-------------|--------|
| 2600009E05I | -1.43  |
| Pccb        | -1.77  |
| Rps16       | -1.35  |
| AI593442    | -1.39  |
| LOC1000477  | -1.42  |
| Cidea       | -1.4   |
| S100a13     | -1.52  |
| Snapin      | -1.34  |
| Tmem82      | -1.41  |
| Ahsa1       | -1.33  |
| Mvp         | -1.31  |
| Phpt1       | -1.43  |
| Art3        | -1.31  |
| Calm2       | -1.42  |
| Calm3       | -1.4   |
| Idh3g       | -1.495 |
| Sepx1       | -1.305 |
| D030028O16  | -1.46  |
| Gstm4       | -1.33  |
| Gstm5       | -1.54  |
| Rpap1       | -1.33  |
| Hist1h2ao   | -1.42  |
| 4933426M11  | -1.41  |
| Hist1h2ah   | -1.31  |
| Myl1        | -1.78  |
| Scn4b       | -1.5   |
| Phkg1       | -1.89  |
| Gusb        | -1.36  |
| Fam131a     | -1.51  |
| Mrpl27      | -1.42  |
| Hspb3       | -1.37  |
| Mrpl23      | -1.42  |
| Fxyd1       | -1.335 |
| Spag7       | -1.61  |
| Mif4gd      | -1.52  |
| Mgst3       | -1.34  |
| Tmem109     | -1.33  |
| Mgst1       | -1.41  |
| Rcsd1       | -1.47  |
| Med16       | -1.47  |
| Tmem100     | -1.4   |
| Txnrd2      | -1.33  |

|            |        |
|------------|--------|
| Ywhag      | -1.64  |
| Ensa       | -1.44  |
| BC026585   | -1.58  |
| Nenf       | -1.35  |
| Nfu1       | -1.46  |
| Sod1       | -1.31  |
| Dnajc27    | -1.33  |
| Cryab      | -1.39  |
| Acadvl     | -1.37  |
| Aldoa      | -1.4   |
| Rps25      | -1.4   |
| Rps3a      | -1.54  |
| Sdhc       | -1.51  |
| 1110036003 | -1.39  |
| Sdhd       | -1.31  |
| Cd74       | -1.45  |
| Rsn        | -1.49  |
| Gpt1       | -1.4   |
| Mrpl16     | -1.5   |
| Bri3       | -1.36  |
| Arpc1b     | -1.33  |
| Prdx5      | -1.33  |
| Trap1      | -1.4   |
| Gtf3c1     | -1.46  |
| Ier3       | -1.86  |
| Slc25a34   | -1.385 |
| Trpc4ap    | -1.35  |
| Slc25a39   | -1.51  |
| Ctdsp1     | -1.305 |
| Sfrs16     | -1.4   |
| Uqcrc1     | -1.43  |
| C030006K11 | -1.33  |
| Sdpr       | -1.48  |
| Vbp1       | -1.31  |
| Phax       | -1.35  |
| 2900010M23 | -1.67  |
| Sorcs2     | -1.32  |
| Ppm1k      | -1.45  |
| Ebpl       | -1.34  |
| Eif3f      | -1.43  |
| 4930402H24 | -1.6   |
| Npm3-ps1   | -1.43  |

|             |        |
|-------------|--------|
| Ces3        | -1.6   |
| Sfrs14      | -1.33  |
| Eif4ebp1    | -1.44  |
| Tnni3       | -1.95  |
| Tmem86a     | -1.42  |
| Gstk1       | -1.35  |
| LOC1000484  | -1.63  |
| Rdm1        | -1.72  |
| 2310076L09F | -1.565 |
| 9130213B05I | -1.355 |
| Fkbp11      | -1.47  |
| Tmem50a     | -1.37  |
| Psme1       | -1.475 |
| LOC677317   | -1.62  |
| Fabp3       | -1.31  |
| Yeats4      | -1.455 |
| Ddrgk1      | -1.41  |
| Cs          | -1.4   |
| Cox7a1      | -1.42  |
| Dusp23      | -1.52  |
| Irx3        | -1.9   |
| Mod1        | -1.4   |
| Gm2a        | -1.37  |
| Pnck        | -1.35  |
| Galk1       | -1.33  |
| Psmb5       | -1.33  |
| Rps21       | -1.36  |
| Psmd14      | -1.31  |
| Ak1         | -2.75  |
| Hcn2        | -1.89  |
| Mif         | -1.31  |
| Eif3k       | -1.54  |
| Snf8        | -1.36  |
| Fbp2        | -2.88  |
| Rrbp1       | -1.33  |
| Actr3       | -1.38  |
| Lrg1        | -1.61  |
| Npm3        | -1.365 |
| Rpl36a      | -1.75  |
| Fhod1       | -1.33  |
| LOC1000472  | -1.4   |
| Lrrc8       | -1.4   |

|             |        |
|-------------|--------|
| Retsat      | -1.7   |
| Aamp        | -1.57  |
| LOC333331   | -1.31  |
| Sord        | -1.53  |
| Ndufs3      | -1.31  |
| Gm1673      | -1.43  |
| Glrx        | -1.47  |
| Thoc3       | -1.35  |
| Trappc2l    | -1.31  |
| 1500012F01f | -1.42  |
| Rps10       | -1.36  |
| Lypd2       | -1.46  |
| 1700025K23l | -1.5   |
| Ndufb9      | -1.38  |
| 2-Mar       | -1.36  |
| A730008L03l | -1.725 |
| Ndufb5      | -1.41  |
| Rshl2a      | -1.36  |
| Etfdh       | -1.38  |
| Gaa         | -1.4   |
| Rps5        | -1.43  |
| LOC1000442l | -1.31  |
| Rps2        | -1.38  |
| Robld3      | -1.31  |
| Myoz2       | -1.31  |
| Decr1       | -1.41  |
| Hfe         | -1.48  |
| Ddah2       | -1.35  |
| Rps8        | -1.32  |
| Aplnr       | -1.53  |
| Pygo2       | -1.39  |
| Gstp2       | -2.04  |
| Epb4.1l3    | -1.365 |
| Myh9        | -1.45  |
| Lsm10       | -1.42  |
| Fyco1       | -1.43  |
| Hr          | -1.62  |
| lgtp        | -1.38  |
| Zxda        | -1.33  |
| F730014l05R | -1.36  |
| Atp6v0e2    | -1.44  |
| Kptn        | -1.4   |

|        |       |
|--------|-------|
| Acy3   | -1.55 |
| Klra19 | -1.46 |
