# Supplementary material for: Negative Elongation Factor Controls Energy Homeostasis in Cardiomyocytes
Source: PubMed Central journal article supplement — Cell Rep. Author manuscript; Available in PMC 2014 Dec 26. (PMC4277258; doi:10.1016/j.celrep.2014.02.028), 2014-03-20
Supplement: NIHMS649550-supplement-supplemental_table_3.pdf [file NIHMS649550-supplement-supplemental_table_3.pdf]

Table S3. Metabolites exhibiting significant differences in relative quantity in left ventricles of KO mice compared to WT

| Metabolite                                            | $\log_2(\text{KO}/\text{WT})^1$ | $t$ -Test <sup>2</sup> |
|-------------------------------------------------------|---------------------------------|------------------------|
| <i>Acyl-carnitines</i> <sup>3</sup>                   |                                 |                        |
| 6:0                                                   | -0.89                           | 0.0436                 |
| 16:0                                                  | -1.52                           | 0.0109                 |
| 18:0                                                  | -2.51                           | 0.0003                 |
| 18:1                                                  | -1.33                           | 0.0125                 |
| <i>Ceramides</i> <sup>4</sup>                         |                                 |                        |
| C8-Dihydroceramide                                    | 2.33                            | 0.0002                 |
| Cer(32:1)                                             | 0.97                            | 0.0014                 |
| Cer(33:1)                                             | 1.23                            | 0.0009                 |
| Cer(34:1)                                             | 0.35                            | 0.0192                 |
| Cer(36:1)                                             | 0.54                            | 0.0003                 |
| Cer(36:2)                                             | 1.60                            | <0.0001                |
| Cer(37:1)                                             | 0.65                            | 0.0002                 |
| Cer(38:1)                                             | 0.34                            | 0.0007                 |
| Cer(38:2)                                             | 0.23                            | 0.0055                 |
| Cer(40:1)                                             | 0.23                            | 0.0402                 |
| Cer(42:1)                                             | 0.27                            | 0.0139                 |
| <i>TCA cycle and related metabolites</i> <sup>5</sup> |                                 |                        |
| Aconitate                                             | 1.38                            | 0.0026                 |
| Citrate                                               | 1.20                            | 0.0023                 |
| Succinate                                             | 0.57                            | 0.0200                 |
| Hydroxyglutarate                                      | 0.75                            | <0.0001                |

<sup>1</sup> Ratio of normalized extracted ion current peak areas

<sup>2</sup> P-values, two-tailed Student's t-test

<sup>3</sup> Number of carbons:number of double bonds

<sup>4</sup> Shown in parentheses are the total number of carbons:total number of double bonds

<sup>5</sup>  $\alpha$ -Ketoglutarate, malate and pyruvate did not exhibit significant differences in relative peak area; fumarate and oxaloacetate were not detected.
