# Supplementary material for: Negative Elongation Factor Controls Energy Homeostasis in Cardiomyocytes
Source: PubMed Central journal article supplement — Cell Rep. Author manuscript; Available in PMC 2014 Dec 26. (PMC4277258; doi:10.1016/j.celrep.2014.02.028), 2014-03-20
Supplement: NIHMS649550-supplement-supplemental_table_4.pdf [file NIHMS649550-supplement-supplemental_table_4.pdf]

|              | Forward                 | Reverse                 |
|--------------|-------------------------|-------------------------|
| Cpt1b-TSS    | GAGAGGCCAGACCCATACACC   | CCCCAACTCACAGCTCAGGT    |
| Cpt1b-1kb    | GGGACCTGGAAGGCACAAGT    | CTTGGGAACTGTCTGGCTC     |
| Idh3g-TSS    | CCATACCCCGGATTTCTCG     | TTAAGCACCGTTCTCGCGAC    |
| Idh3g-1kb    | AGCATAGGAGGCAGCTGTGG    | TGGCAACAACATTGCTAGGG    |
|              |                         |                         |
| Retsat-TSS   | AGGACGCGGTCTTCCGAG      | AGCAGAGCAGTGATCCACATGT  |
| Acot1-TSS    | CCTCCTCTTCCAGTCCAGCTC   | AGGGCTCAAGGTTCCAGCGT    |
| Ech1-TSS     | TCGGGAGTAAGTCGCACAGC    | TCATCGCGGTAGCCATTCT     |
| Ephx2-TSS    | AGCCAGCCTCCCCACTCTAG    | TGACACAGACACGAAGCTGGA   |
| Abdh1-TSS    | CGCAAGCGGAAGAGTCAAAG    | GGTATTCCATTGCCAGGCTC    |
| Cpt2-TSS     | GGAAGTGCCCTGTGGG        | CACCCGTAGAGACTTAACGTCCA |
| Etfdh-TSS    | TGGCTTGATGTGACCCGG      | CGCCACAGAGGACACGAAG     |
| Derc1-TSS    | CTCTGGACAAAATTCTCCCTTGA | CCGCCTGCTCCTTGCA        |
| Coq3-TSS     | GGGACCGAAAAGGAGTAGG     | GCCTTCCACCTCTCCACATC    |
| Ucp3-TSS     | CGTCAGATCCTGCTGCTACCT   | AGTGCAGGGCCACCCTAAG     |
| Leprel4-TSS  | CACGTAGTGGACTCGAGCGTC   | GGCTGGAATGCCTCTCTAGGA   |
| Plin5-TSS    | GGGATACATAGGGCATGAGCC   | ACCCTCAGCTGTCCACGG      |
| Fah-TSS      | GAATCTAAAGGCCCTCGGCT    | ACGGGACTATGCTTAGGGCA    |
| Slc25a20-TSS | TCATTAGGGAAAGAGCCCCG    | TCTACTTCCGGCTGCCCTC     |
| Abat1-TSS    | AAGCAAGGGCTAGAGGCAGTG   | AAGCTTCGCCGAGCCAC       |
| Fbp2-TSS     | TCGGACTTTGGCACAGTCAAG   | GCAGCCTCACAGCCTACTCG    |
| Lgals4-TSS   | AATGGCAGAAGTGAACCCAG    | CCAGTGCACACGCAGCTG      |
|              |                         |                         |
| Coq3-PBS     | GGTAGCCCACGACCTTTGC     | GCCACAAGCTCATAGAACGCA   |
| Ech1-PBS     | TGGGCCAAAGGTTAAGCAA     | GCACTCCTTCGTGTCTCATGTG  |
| Retsat-PBS   | CACTCCTGTGAGCCCAGCAT    | TTGCCATGAATCTCCTGCCT    |
| Cpt2-PBS     | GCTGAGTCAGATGGGCACTGA   | ACCTGGGTAAGGCACAGGC     |
